# Supplementary material for: Determining theQ–evalues of polymer radicals and monomers separately through the derivation of an intrinsicQ–escheme for radical copolymerization
Source: Royal Society of Chemistry journal article supplement (doi:10.1039/d1py01190a), 2022-01-01
Supplement: d1py01190a1.pdf [file d1py01190a1.pdf]

## Supporting Information

### Determining the $Q$ - $e$ values of polymer radicals and monomers separately through the derivation of an intrinsic $Q$ - $e$ scheme for radical copolymerization

Susumu Kawauchi,\* Akinori Akatsuka, Yoshihiro Hayashi, Hidemine Furuya, Toshikazu Takata

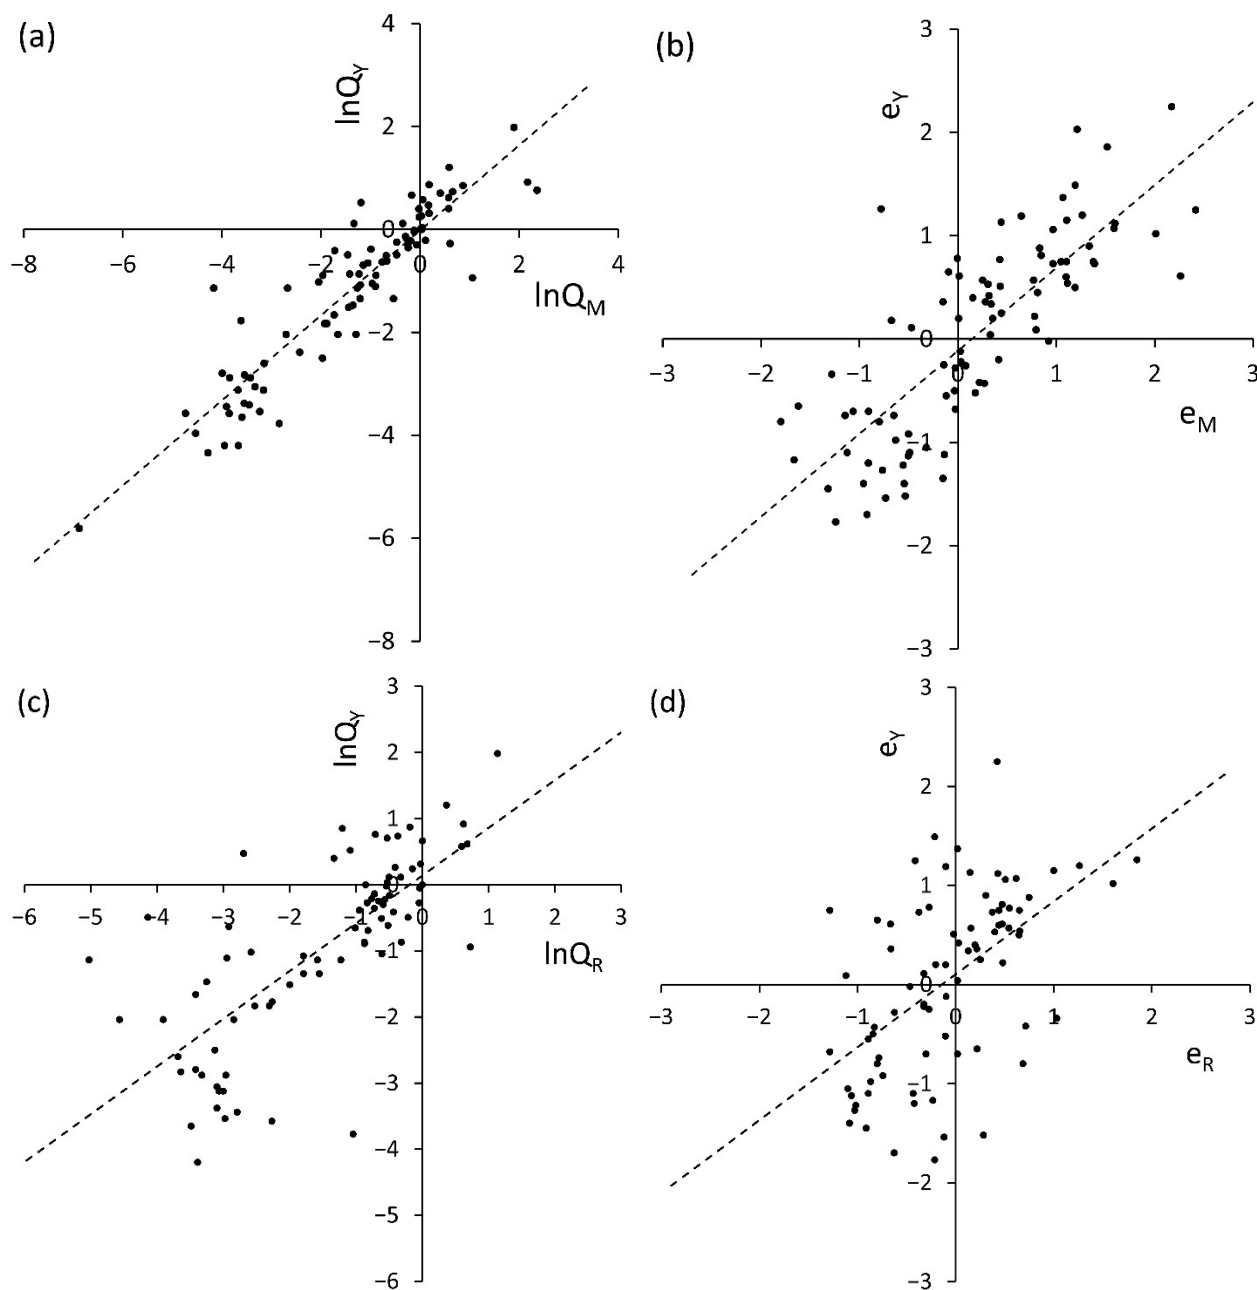

Figure S1. Relationship between the  $Q$ - $e$  values for a monomer ( $Q_M, e_M$ ) and a radical ( $Q_R, e_R$ ) and the Young's  $Q$ - $e$  values ( $Q_Y, e_Y$ ) for 82 monomers: (a)  $\ln Q_Y$  vs  $\ln Q_M$ , (b)  $e_Y$  vs  $e_M$ , (c)  $\ln Q_Y$  vs  $\ln Q_R$ , and (d)  $e_Y$  vs  $e_R$ . The dashed lines indicate the regression lines corresponding to (a)  $\ln Q_Y = 0.826 \ln Q_M - 0.013$  ( $r^2 = 0.840$ ), (b)  $e_Y = 0.802 e_M - 0.117$  ( $r^2 = 0.638$ ), (c)  $\ln Q_Y = 0.722 \ln Q_R + 0.141$  ( $r^2 = 0.546$ ), and (d)  $e_Y = 0.735 e_R + 0.102$  ( $r^2 = 0.298$ ), respectively.



Table S1. Reactivity ratios with respect to styrene and acrylonitrile ( $r_{1S}, r_{1A}, r_{A1}, r_{S1}$ ), and the intrinsic  $Q$ - $e$  parameters ( $Q_M^\circ, Q_R^\circ, e_M^\circ, e_R^\circ$ )<sup>a</sup>

| Monomer                             | $r_{1S}$ | $r_{1A}$ | $r_{A1}$ | $r_{S1}$ | $Q_M^\circ$ | $Q_R^\circ$ | $e_M^\circ$ | $e_R^\circ$ |
|-------------------------------------|----------|----------|----------|----------|-------------|-------------|-------------|-------------|
| Acenaphthylene                      | 0.330    | 2.560    | 0.020    | 3.810    | 0.26        | 0.33        | -2.03       | 3.02        |
| Acetylene, phenyl                   | 0.330    | 0.330    | 0.270    | 0.320    | 3.13        | 0.33        | 3.05        | 0.97        |
| Aconitate, trimethyl                |          |          | 4.240    | 1.026    | 0.97        |             | 4.64        |             |
| Acrolein                            | 0.270    | 1.110    | 0.780    | 0.230    | 4.35        | 0.27        | 4.44        | 2.38        |
| Acrolein, methyl                    | 0.600    | 3.100    | 0.150    | 0.260    | 3.85        | 0.60        | 2.67        | 2.61        |
| Acrylamide                          | 0.700    | 1.100    | 0.900    | 1.200    | 0.83        | 0.70        | 2.93        | 1.42        |
| Acrylamide, <i>N</i> -methylol      | 0.480    | 2.430    | 0.600    | 0.030    | 33.33       | 0.48        | 6.21        | 2.59        |
| Acrylamide, <i>N</i> -octadecyl     | 0.540    | 1.400    | 1.030    | 2.080    | 0.48        | 0.54        | 2.52        | 1.92        |
| Acrylate, benzyl                    | 0.200    | 0.720    | 1.490    | 0.490    | 2.04        | 0.20        | 4.33        | 2.25        |
| Acrylate, butyl                     | 0.180    | 0.970    | 1.110    | 0.770    | 1.30        | 0.18        | 3.58        | 2.65        |
| Acrylate, 2-chloroethyl             | 0.120    | 0.870    | 1.030    | 0.530    | 1.89        | 0.12        | 3.88        | 2.95        |
| Acrylate, $\alpha$ -chloro-, methyl | 0.300    | 1.760    | 0.120    | 0.250    | 4.00        | 0.30        | 2.48        | 2.74        |
| Acrylate, $\alpha$ -cyano-, methyl  | 0.610    | 0.680    | 0.010    | 0.050    | 20.00       | 0.61        | 1.61        | 1.08        |
| Acrylate, 3,4-epoxyhexahydrobenzyl  | 1.970    | 0.390    | 0.250    | 0.270    | 3.70        | 1.97        | 3.14        | -0.65       |
| Acrylate, $\beta$ -ethoxy-, ethyl   |          |          | 2.420    | 46.98    | 0.02        |             | 0.25        |             |
| Acrylate, ethyl                     | 0.170    | 0.870    | 0.800    | 0.810    | 1.23        | 0.17        | 3.21        | 2.60        |
| Acrylate, methyl                    | 0.180    | 0.850    | 1.420    | 0.750    | 1.33        | 0.18        | 3.86        | 2.52        |
| Acrylate, octadecyl                 | 0.260    | 1.200    | 3.150    | 0.610    | 1.64        | 0.26        | 4.86        | 2.50        |
| Acrylate, octyl                     | 0.125    | 0.840    | 1.980    | 0.390    | 2.56        | 0.13        | 4.84        | 2.87        |
| Acrylate, 2-nitrobutyl              | 0.120    | 1.760    | 0.670    | 0.350    | 2.86        | 0.12        | 3.87        | 3.65        |
| Acrylate, $\alpha$ -phenyl-, methyl | 1.280    | 6.700    | 0.080    | 0.060    | 16.67       | 1.28        | 3.51        | 2.62        |
| Acrylate, di-zinc                   | 0.900    | 0.240    | 0.410    | 1.100    | 0.91        | 0.90        | 2.23        | -0.35       |
| Acrylonitrile ( <i>reference</i> )  | 0.040    | 1.000    | 1.000    | 0.380    | 2.63        | 0.04        | 4.19        | 4.19        |

|                                          |       |       |        |       |       |      |      |       |
|------------------------------------------|-------|-------|--------|-------|-------|------|------|-------|
| Acryloyl chloride                        | 0.020 | 1.000 | 1.200  | 0.100 | 10.00 | 0.02 | 5.70 | 4.88  |
| Allyl acetate                            |       |       | 6.570  | 90.00 | 0.01  |      | 0.60 |       |
| Allyl chloride                           | 0.040 | 0.040 | 2.800  | 36.00 | 0.03  | 0.04 | 0.66 | 0.97  |
| Aniline, <i>N,N</i> -divinyl             | 0.033 | 0.050 | 0.246  | 5.380 | 0.19  | 0.03 | 0.13 | 1.38  |
| Benzothiazole, vinylmercapto-            | 0.420 | 0.180 | 0.190  | 2.600 | 0.38  | 0.42 | 0.60 | 0.12  |
| Butadiene                                | 1.400 | 0.290 | 0.060  | 0.570 | 1.75  | 1.40 | 0.97 | -0.61 |
| Butadiene-1-carboxylic acid              | 5.550 | 7.500 | 0.120  | 0.115 | 8.70  | 5.55 | 3.26 | 1.27  |
| Butadiene-1-carboxylate, ethyl           | 0.300 | 3.200 | 0.300  | 0.120 | 8.33  | 0.30 | 4.14 | 3.33  |
| Butadiene-1,4-dicarboxylic acid          | 0.520 | 4.000 | 0.200  | 0.150 | 6.67  | 0.52 | 3.51 | 3.01  |
| Butadiene, 1,4-dicarboxylate-, diethyl   | 0.550 | 2.790 | 0.290  | 0.090 | 11.11 | 0.55 | 4.39 | 2.59  |
| Butadiene, 2-chloro-                     | 6.910 | 5.180 | 0.050  | 0.038 | 26.32 | 6.91 | 3.49 | 0.68  |
| Butadiene, 2-fluoro-                     | 1.670 | 0.600 | 0.077  | 0.220 | 4.55  | 1.67 | 2.17 | -0.06 |
| Butadiene, 2-trimethylsilyloxy-          | 1.200 | 0.070 | 0.036  | 0.640 | 1.56  | 1.20 | 0.34 | -1.87 |
| Carbazole, <i>N</i> -vinyl               |       |       | 0.390  | 5.820 | 0.17  |      | 0.52 |       |
| Cinnamionitrile                          | 0.050 | 0.360 | 8.460  | 2.550 | 0.39  | 0.05 | 4.42 | 2.94  |
| Citraconimide, <i>N</i> -methyl-         | 0.240 | 0.600 | 0.530  | 0.145 | 6.90  | 0.24 | 4.52 | 1.88  |
| Crotonaldehyde                           | 0.070 | 0.010 | 25.00  | 14.70 | 0.07  | 0.07 | 3.75 | -0.98 |
| Crotonate, $\alpha$ -acetyl-, methyl     |       |       | 8.680  | 2.700 | 0.37  |      | 4.39 |       |
| Crotonate, $\alpha$ -carboethoxy-, ethyl |       |       | 18.70  | 8.240 | 0.12  |      | 4.04 |       |
| Crotonate, $\alpha$ -chloro-, ethyl      |       |       | 9.530  | 5.130 | 0.19  |      | 3.84 |       |
| Crotonate, $\alpha$ -cyano-, ethyl       | 0.020 | 0.060 | 11.400 | 0.260 | 3.85  | 0.02 | 7.00 | 2.07  |
| Crotonate, ethyl                         |       |       | 25.20  | 27.00 | 0.04  |      | 3.15 |       |
| Crotonate, $\alpha$ -methoxy-, methyl    | 0.040 | 0.050 | 1.000  | 18.40 | 0.05  | 0.04 | 0.31 | 1.19  |
| Crotonate, $\alpha$ -methyl-, methyl     | 0.020 | 0.050 | 2.970  | 39.70 | 0.03  | 0.02 | 0.63 | 1.88  |
| Crotonic acid                            |       |       | 21.00  | 20.00 | 0.05  |      | 3.27 |       |
| Diallylphthalate                         | 0.076 | 0.039 | 3.500  | 23.50 | 0.04  | 0.08 | 1.31 | 0.29  |
| Ethylene                                 | 0.050 | 0.050 | 7.000  | 14.88 | 0.07  | 0.05 | 2.46 | 0.97  |

|                                        |       |       |       |       |       |      |       |       |
|----------------------------------------|-------|-------|-------|-------|-------|------|-------|-------|
| Ethylene, tetrachloro-                 |       |       | 463.0 | 195.0 | 0.01  |      | 4.08  |       |
| Ethylene, trichloro-                   |       |       | 64.50 | 14.60 | 0.07  |      | 4.70  |       |
| Ethylene, diphenyl-                    |       |       | 0.050 | 0.335 | 2.99  |      | 1.32  |       |
| Fumarate, diethyl                      | 0.060 | 0.050 | 9.000 | 0.330 | 3.03  | 0.06 | 6.52  | 0.79  |
| Fumarate, diisopropyl                  | 0.055 | 0.200 | 16.00 | 0.400 | 2.50  | 0.06 | 6.91  | 2.26  |
| Hexatriene, tetrachloro-               | 0.850 | 4.010 | 0.234 | 0.123 | 8.13  | 0.85 | 3.86  | 2.52  |
| Imidazole, <i>N</i> -vinyl             | 0.680 | 0.832 | 3.390 | 8.380 | 0.12  | 0.68 | 2.31  | 1.17  |
| Isoprene                               | 1.840 | 0.450 | 0.030 | 0.458 | 2.18  | 1.84 | 0.49  | -0.44 |
| Isopropenyl isocyanate                 | 0.096 | 0.100 | 0.240 | 7.480 | 0.13  | 0.10 | -0.22 | 1.01  |
| Isopropenyl methyl ketone              | 0.480 | 0.950 | 0.330 | 0.380 | 2.63  | 0.48 | 3.08  | 1.65  |
| Itaconic acid                          | 0.120 | 0.860 | 0.590 | 0.260 | 3.85  | 0.12 | 4.04  | 2.94  |
| Itaconic anhydride                     | 0.550 | 4.830 | 0.034 | 0.031 | 32.26 | 0.55 | 3.31  | 3.14  |
| Maleate, diethyl                       | 0.040 | 0.050 | 16.00 | 7.030 | 0.14  | 0.04 | 4.04  | 1.19  |
| Maleic anhydride                       | 0.011 | 0.050 | 6.000 | 0.360 | 2.78  | 0.01 | 6.03  | 2.48  |
| Maleimide, <i>N</i> -(2-chlorophenyl)- | 0.021 | 1.078 | 0.956 | 0.025 | 40.82 | 0.02 | 6.88  | 4.91  |
| Methacrylamide, <i>N</i> -phenyl-      | 0.880 | 0.710 | 0.381 | 1.240 | 0.81  | 0.88 | 2.04  | 0.75  |
| Methacrylate, benzyl                   | 0.470 | 0.960 | 0.200 | 0.520 | 1.92  | 0.47 | 2.26  | 1.68  |
| Methacrylate, 2-bromoethyl             | 0.410 | 2.380 | 0.310 | 0.320 | 3.13  | 0.41 | 3.19  | 2.73  |
| Methacrylate, butyl                    | 0.530 | 0.980 | 0.291 | 0.600 | 1.67  | 0.53 | 2.50  | 1.58  |
| Methacrylate, isobutyl                 | 0.420 | 1.050 | 0.217 | 0.540 | 1.85  | 0.42 | 2.31  | 1.88  |
| Methacrylate, 2-chloroethyl            | 0.300 | 1.300 | 0.140 | 0.370 | 2.70  | 0.30 | 2.25  | 2.43  |
| Methacrylate, ferrocenylmethyl         | 0.010 | 0.820 | 0.150 | 3.600 | 0.28  | 0.01 | 0.04  | 5.37  |
| Methacrylate, glycidyl                 | 0.500 | 1.320 | 0.140 | 0.415 | 2.41  | 0.50 | 2.13  | 1.94  |
| Methacrylate, 2-hydroxyethyl           | 0.640 | 1.000 | 0.200 | 0.480 | 2.08  | 0.64 | 2.34  | 1.41  |
| Methacrylate, methyl                   | 0.460 | 1.320 | 0.138 | 0.500 | 2.00  | 0.46 | 1.93  | 2.02  |
| Methacrylate, 3,5-dimethyladamantyl    | 0.630 | 1.300 | 0.190 | 0.890 | 1.12  | 0.63 | 1.67  | 1.69  |
| Methacrylate, 2,2,6,6-                 | 0.300 | 14.00 | 0.020 | 0.630 | 1.59  | 0.30 | -0.23 | 4.81  |

|                                                 |       |       |       |       |       |       |      |       |
|-------------------------------------------------|-------|-------|-------|-------|-------|-------|------|-------|
| tetramethyl-4-piperidinyl-                      |       |       |       |       |       |       |      |       |
| Methacrylate, phenyl                            | 0.510 | 0.460 | 0.360 | 0.250 | 4.00  | 0.51  | 3.58 | 0.86  |
| Methacrylic acid                                | 0.524 | 0.200 | 0.040 | 0.240 | 4.17  | 0.52  | 1.43 | 0.00  |
| Methacrylonitrile                               | 0.330 | 1.670 | 0.430 | 0.380 | 2.63  | 0.33  | 3.34 | 2.59  |
| Methacryloylacetone                             | 1.660 | 3.740 | 0.010 | 0.067 | 14.93 | 1.66  | 1.32 | 1.78  |
| Methylenebutyrolactone                          | 0.700 | 1.100 | 0.090 | 0.090 | 11.11 | 0.70  | 3.22 | 1.42  |
| Naphthalene, 1-vinyl-                           | 2.020 | 0.451 | 0.107 | 0.699 | 1.43  | 2.02  | 1.34 | -0.53 |
| Oct-1-ene, 6,6-dimethyl-4,8-dioxaspiro (2,5)-   | 0.271 | 1.484 | 0.985 | 1.930 | 0.52  | 0.27  | 2.55 | 2.67  |
| Oxazoline, 2-isopropenyl-                       | 0.640 | 0.520 | 0.130 | 0.670 | 1.49  | 0.64  | 1.58 | 0.76  |
| Oxazoline, 2-isopropenyl-4,4-dimethyl-          | 0.680 | 1.830 | 0.240 | 0.550 | 1.82  | 0.68  | 2.39 | 1.96  |
| Pentadienoate, trans-4-ethoxy-2,4-, ethyl       | 12.20 | 5.400 | 0.010 | 0.040 | 25.00 | 12.20 | 1.83 | 0.15  |
| Phthalimide, N-vinyl-                           | 0.070 | 0.240 | 0.430 | 6.270 | 0.16  | 0.07  | 0.54 | 2.20  |
| Propene, 3,3,3-trichloro-                       | 0.050 | 0.100 | 12.20 | 6.900 | 0.14  | 0.05  | 3.79 | 1.66  |
| Pyridazinone, 3-(2-vinyl)-6-methyl-             | 0.850 | 0.190 | 0.320 | 0.900 | 1.11  | 0.85  | 2.18 | -0.53 |
| Pyridazinone, 3-(2-vinyl)-6-methyl-4,5-dihydro- | 0.130 | 0.020 | 0.740 | 5.920 | 0.17  | 0.13  | 1.14 | -0.90 |
| Pyridine, 2-methyl-5-vinyl-                     | 0.850 | 0.310 | 0.160 | 0.700 | 1.43  | 0.85  | 1.74 | -0.04 |
| Pyridine, 2-vinyl-                              | 1.260 | 0.440 | 0.100 | 0.530 | 1.89  | 1.26  | 1.55 | -0.08 |
| Pyridine, 2-vinyl-5-ethyl-                      | 1.090 | 0.430 | 0.040 | 0.740 | 1.35  | 1.09  | 0.30 | 0.04  |
| Pyridine, 4-vinyl-                              | 0.690 | 0.375 | 0.100 | 0.520 | 1.92  | 0.69  | 1.57 | 0.36  |
| Silane, 3-methacryloxypropyl, trimethoxy-       | 0.868 | 3.790 | 0.094 | 0.425 | 2.35  | 0.87  | 1.71 | 2.44  |
| Styrene ( <i>reference</i> )                    | 1.000 | 0.380 | 0.040 | 1.000 | 1.00  | 1.00  | 0.00 | 0.00  |
| Styrene, <i>p</i> -acetoxy-                     | 1.260 | 0.400 | 0.070 | 0.860 | 1.16  | 1.26  | 0.71 | -0.18 |
| Styrene, 3-tri- <i>n</i> -butylstannyl-         | 0.030 | 0.001 | 4.880 | 18.50 | 0.05  | 0.03  | 1.89 | -2.43 |
| Styrene, 2,5-dichloro-                          | 0.400 | 0.080 | 0.240 | 0.236 | 4.24  | 0.40  | 3.24 | -0.64 |

|                                                |       |       |       |       |      |      |       |       |
|------------------------------------------------|-------|-------|-------|-------|------|------|-------|-------|
| Styrene, <i>p</i> -chloromethyl-               | 1.120 | 0.560 | 0.067 | 0.620 | 1.61 | 1.12 | 0.99  | 0.27  |
| Styrene, <i>p</i> -1-(2-hydroxypropyl)-        | 0.910 | 0.530 | 0.100 | 0.970 | 1.03 | 0.91 | 0.95  | 0.43  |
| Styrene, $\alpha$ -methoxy                     | 0.070 | 0.050 | 0.060 | 2.510 | 0.40 | 0.07 | -0.51 | 0.63  |
| Styrene, $\alpha$ -methyl                      | 0.600 | 0.143 | 0.047 | 1.100 | 0.91 | 0.60 | 0.07  | -0.47 |
| Styrene, <i>p</i> -methyl                      | 0.993 | 0.330 | 0.050 | 0.891 | 1.12 | 0.99 | 0.34  | -0.13 |
| Succinimide, <i>N</i> -vinyl                   | 0.033 | 0.516 | 0.116 | 7.710 | 0.13 | 0.03 | -0.98 | 3.72  |
| Tetrazole, 1-vinyl-                            | 0.184 | 0.314 | 0.540 | 3.850 | 0.26 | 0.18 | 1.25  | 1.50  |
| Tetrazole, 5-phenyl-2-(4'-vinyl)-phenyl-       | 2.200 | 1.400 | 0.320 | 0.480 | 2.08 | 2.20 | 2.81  | 0.52  |
| Toluenesulphonamide, <i>N,N</i> -methyl-vinyl- | 0.050 | 0.040 | 0.420 | 5.600 | 0.18 | 0.05 | 0.63  | 0.74  |
| Triallyl citrate                               | 0.076 | 0.050 | 1.760 | 20.00 | 0.05 | 0.08 | 0.79  | 0.55  |
| Vinyl acetate                                  | 0.020 | 0.050 | 4.780 | 48.00 | 0.02 | 0.02 | 0.91  | 1.88  |
| Vinyl benzoate                                 | 0.060 | 0.019 | 5.030 | 31.56 | 0.03 | 0.06 | 1.38  | -0.18 |
| Vinyl benzoic acid, <i>p</i> -                 | 1.030 | 1.630 | 0.060 | 0.282 | 3.55 | 1.03 | 1.67  | 1.43  |
| Vinyl benzyl methyl carbinol                   | 0.940 | 0.540 | 0.110 | 0.980 | 1.02 | 0.94 | 1.03  | 0.41  |
| Vinyl bromide                                  | 0.054 | 0.060 | 2.520 | 16.60 | 0.06 | 0.05 | 1.33  | 1.07  |
| Vinyl isobutyl ether                           | 0.320 | 0.400 | 0.400 | 24.50 | 0.04 | 0.32 | -0.90 | 1.19  |
| Vinyl butyl sulfide                            | 0.050 | 0.041 | 0.086 | 2.690 | 0.37 | 0.05 | -0.22 | 0.77  |
| Vinyl isobutyl sulfide                         | 0.050 | 0.027 | 0.074 | 2.380 | 0.42 | 0.05 | -0.25 | 0.35  |
| Vinyl tert-butyl sulfide                       | 0.158 | 0.050 | 0.090 | 4.360 | 0.23 | 0.16 | -0.66 | -0.18 |
| Vinyl chloride                                 | 0.055 | 0.045 | 3.290 | 18.70 | 0.05 | 0.06 | 1.48  | 0.77  |
| Vinyl chloroacetate                            | 0.030 | 0.090 | 0.340 | 45.00 | 0.02 | 0.03 | -1.67 | 2.07  |
| Vinyl dichloroacetate                          | 0.280 | 0.040 | 3.850 | 20.00 | 0.05 | 0.28 | 1.57  | -0.98 |
| Vinyl 2-chloroethyl ether                      | 0.070 | 0.050 | 1.090 | 160.0 | 0.01 | 0.07 | -1.77 | 0.63  |
| Vinyl chloromethyl ketone                      | 0.507 | 0.880 | 0.064 | 0.127 | 7.87 | 0.51 | 2.53  | 1.52  |
| Vinyl cymantrene                               | 0.096 | 0.050 | 0.446 | 2.320 | 0.43 | 0.10 | 1.57  | 0.32  |
| Vinyl dodecyl ether                            |       |       | 0.820 | 41.50 | 0.02 |      | -0.71 |       |

|                                    |       |       |       |       |      |      |       |       |
|------------------------------------|-------|-------|-------|-------|------|------|-------|-------|
| Vinylene carbonate                 | 0.050 | 0.080 | 14.90 | 70.00 | 0.01 | 0.05 | 1.67  | 1.44  |
| Vinyl ethyl ether                  | 0.050 | 0.060 | 0.690 | 100.0 | 0.01 | 0.05 | -1.76 | 1.15  |
| Vinyl ethyl oxalate                |       |       | 1.340 | 5.620 | 0.18 |      | 1.79  |       |
| Vinyl ethyl sulfide                | 0.182 | 0.055 | 0.075 | 5.380 | 0.19 | 0.18 | -1.05 | -0.23 |
| Vinyl ethyl sulfoxide              | 0.100 | 0.050 | 1.630 | 7.820 | 0.13 | 0.10 | 1.65  | 0.27  |
| Vinyl ferrocene                    | 0.170 | 0.158 | 0.173 | 3.570 | 0.28 | 0.17 | 0.19  | 0.89  |
| Vinyl hendecanoate                 | 0.050 | 0.090 | 1.880 | 24.89 | 0.04 | 0.05 | 0.64  | 1.56  |
| Vinylidene chloride                | 0.108 | 0.320 | 0.640 | 1.790 | 0.56 | 0.11 | 2.19  | 2.06  |
| Vinyl isocyanate                   | 0.080 | 0.160 | 0.190 | 8.130 | 0.12 | 0.08 | -0.54 | 1.66  |
| Vinyl isothiocyanate               | 0.435 | 1.400 | 0.360 | 0.725 | 1.38 | 0.44 | 2.52  | 2.14  |
| Vinyl methyl ketone                | 0.320 | 1.570 | 0.610 | 0.290 | 3.45 | 0.32 | 3.96  | 2.56  |
| Vinyl phenyl ether                 | 0.010 | 0.230 | 2.500 | 1.700 | 0.59 | 0.01 | 3.60  | 4.10  |
| Vinyl phenyl sulfide               | 0.140 | 0.030 | 0.110 | 3.800 | 0.26 | 0.14 | -0.32 | -0.57 |
| Vinyl stearate                     | 0.050 | 0.078 | 4.640 | 15.96 | 0.06 | 0.05 | 1.98  | 1.41  |
| Vinyl triethoxysilane              | 0.050 | 0.410 | 6.590 | 20.86 | 0.05 | 0.05 | 2.07  | 3.07  |
| Vinyl-tris(trimethoxysiloxy)silane | 0.005 | 0.075 | 3.900 | 25.00 | 0.04 | 0.01 | 1.36  | 3.68  |
| Vinyl trimethylsilane              | 0.050 | 0.100 | 4.080 | 10.32 | 0.10 | 0.05 | 2.29  | 1.66  |

---

<sup>a</sup>Reactivity ratios were taken from the *Polymer Handbook*.<sup>1</sup>



Table S2.  $Q$ - $e$  parameters for the monomers and radicals ( $Q_M, Q_R, e_M, e_R$ ), Greenley's  $Q$ - $e$  Parameters ( $Q_G, e_G$ ), and Young's  $Q$ - $e$  Parameters ( $Q_Y, e_Y$ )<sup>a</sup>

| Monomer                             | $Q_M$ | $Q_R$ | $e_M$ | $e_R$ | $Q_G$ | $e_G$ | $Q_Y$ | $e_Y$ |
|-------------------------------------|-------|-------|-------|-------|-------|-------|-------|-------|
| Acenaphthylene                      | 0.58  | 0.17  | -1.80 | 0.69  | 0.72  | -1.88 | 0.26  | -0.8  |
| Acetylene, phenyl                   | 0.94  | 0.20  | 0.70  | -0.32 | 0.45  | 0.10  |       |       |
| Aconitate, trimethyl                | 0.16  |       | 1.48  |       | 0.25  | 2.27  |       |       |
| Acrolein                            | 0.76  | 0.61  | 1.39  | 0.37  | 0.80  | 1.31  | 0.85  | 0.73  |
| Acrolein, methyl                    | 1.34  | 1.14  | 0.51  | 0.49  | 1.83  | 0.71  |       |       |
| Acrylamide                          | 0.26  | 0.61  | 0.64  | -0.10 | 0.23  | 0.54  | 1.12  | 1.19  |
| Acrylamide, <i>N</i> -methylol      | 2.88  | 2.06  | 2.26  | 0.48  | 0.52  | 1.15  | 0.39  | 0.61  |
| Acrylamide, <i>N</i> -octadecyl     | 0.18  | 0.65  | 0.44  | 0.15  | 0.66  | 1.64  | 0.66  | 1.13  |
| Acrylate, benzyl                    | 0.37  | 0.39  | 1.33  | 0.31  | 0.33  | 1.13  | 0.68  | 0.9   |
| Acrylate, butyl                     | 0.32  | 0.44  | 0.97  | 0.51  | 0.38  | 0.85  | 0.50  | 1.06  |
| Acrylate, 2-chloroethyl             | 0.41  | 0.42  | 1.11  | 0.65  | 0.49  | 1.03  | 0.41  | 0.54  |
| Acrylate, $\alpha$ -chloro-, methyl | 1.50  | 0.59  | 0.42  | 0.55  | 2.43  | 0.35  | 2.02  | 0.77  |
| Acrylate, $\alpha$ -cyano-, methyl  | 10.61 | 0.49  | -0.01 | -0.27 | 4.91  | 0.91  | 2.14  | 0.78  |
| Acrylate, 3,4-epoxyhexahydrobenzyl  | 1.07  | 0.35  | 0.75  | -1.12 |       |       |       |       |
| Acrylate, $\beta$ -ethoxy-, ethyl   | 0.02  |       | -0.68 |       |       |       | 0.015 | 0.18  |
| Acrylate, ethyl                     | 0.35  | 0.36  | 0.78  | 0.48  | 0.41  | 0.55  | 0.52  | 0.22  |
| Acrylate, methyl                    | 0.29  | 0.42  | 1.10  | 0.44  | 0.45  | 0.64  | 0.42  | 0.6   |
| Acrylate, octadecyl                 | 0.24  | 0.73  | 1.59  | 0.43  | 0.33  | 1.26  | 0.42  | 1.12  |
| Acrylate, octyl                     | 0.38  | 0.54  | 1.59  | 0.62  | 0.63  | 2.01  | 0.35  | 1.07  |
| Acrylate, 2-nitrobutyl              | 0.62  | 0.81  | 1.11  | 1.00  | 0.69  | 1.09  | 0.61  | 1.15  |
| Acrylate, $\alpha$ -phenyl-, methyl | 4.19  | 2.99  | 0.93  | 0.49  | 5.19  | 0.96  |       |       |
| Acrylate, di-zinc                   | 0.38  | 0.31  | 0.30  | -0.97 |       |       |       |       |
| Acrylonitrile ( <i>reference</i> )  | 0.51  | 0.54  | 1.26  | 1.26  | 0.48  | 1.23  | 0.60  | 1.20  |
| Acryloyl chloride                   | 1.06  | 1.81  | 2.01  | 1.60  | 1.82  | 1.92  | 1.78  | 1.02  |

|                                          |      |      |       |       |       |       |       |       |
|------------------------------------------|------|------|-------|-------|-------|-------|-------|-------|
| Allyl acetate                            | 0.01 |      | -0.50 |       | 0.24  | -1.07 | 0.028 | -1.13 |
| Allyl chloride                           | 0.02 | 0.04 | -0.47 | -0.32 | 0.026 | -0.60 | 0.056 | 0.11  |
| Aniline, <i>N,N</i> -divinyl             | 0.18 | 0.03 | -0.73 | -0.12 | 0.26  | -0.68 | 0.19  | -1.54 |
| Benzothiazole, vinylmercapto-            | 0.30 | 0.34 | -0.50 | -0.74 | 0.36  | -0.44 | 1.68  | -0.92 |
| Butadiene                                | 1.20 | 0.83 | -0.32 | -1.10 | 1.70  | -0.50 | 2.39  | -1.05 |
| Butadiene-1-carboxylic acid              | 2.40 | 4.19 | 0.81  | -0.18 |       |       |       |       |
| Butadiene-1-carboxylate, ethyl           | 1.63 | 1.67 | 1.24  | 0.84  | 1.67  | 1.26  |       |       |
| Butadiene-1,4-dicarboxylic acid          | 1.67 | 1.69 | 0.93  | 0.68  |       |       |       |       |
| Butadiene, 1,4-dicarboxylate-, diethyl   | 1.97 | 1.54 | 1.36  | 0.48  | 1.94  | 1.39  |       |       |
| Butadiene, 2-chloro-                     | 6.64 | 3.10 | 0.92  | -0.47 | 10.52 | 1.20  | 7.26  | -0.02 |
| Butadiene, 2-fluoro-                     | 1.93 | 0.69 | 0.27  | -0.83 | 1.88  | 0.63  | 2.08  | -0.43 |
| Butadiene, 2-trimethylsilyloxy-          | 1.37 | 0.90 | -0.63 | -1.72 |       |       |       |       |
| Carbazole, <i>N</i> -vinyl               | 0.14 |      | -0.55 |       | 0.26  | -1.29 | 0.41  | -1.4  |
| Cinnamitrile                             | 0.07 | 0.21 | 1.38  | 0.65  |       |       | 0.32  | 0.75  |
| Citraconimide, <i>N</i> -methyl-         | 1.16 | 0.32 | 1.42  | 0.13  | 0.87  | 1.58  |       |       |
| Crotonaldehyde                           | 0.02 | 0.01 | 1.05  | -1.28 | 0.023 | 0.84  | 0.32  | 0.75  |
| Crotonate, $\alpha$ -acetyl-, methyl     | 0.07 |      | 1.36  |       |       |       |       |       |
| Crotonate, $\alpha$ -carboethoxy-, ethyl | 0.02 |      | 1.19  |       |       |       |       |       |
| Crotonate, $\alpha$ -chloro-, ethyl      | 0.04 |      | 1.09  |       |       |       |       |       |
| Crotonate, $\alpha$ -cyano-, ethyl       | 0.24 | 0.04 | 2.65  | 0.22  |       |       |       |       |
| Crotonate, ethyl                         | 0.01 |      | 0.75  |       |       |       |       |       |
| Crotonate, $\alpha$ -methoxy-, methyl    | 0.05 | 0.04 | -0.65 | -0.21 |       |       |       |       |
| Crotonate, $\alpha$ -methyl-, methyl     | 0.02 | 0.02 | -0.49 | 0.13  |       |       |       |       |
| Crotonic acid                            | 0.01 |      | 0.81  |       | 0.017 | 0.89  | 0.013 | 0.45  |
| Diallylphthalate                         | 0.03 | 0.05 | -0.15 | -0.66 | 0.031 | -0.26 | 0.044 | 0.36  |
| Ethylene                                 | 0.03 | 0.03 | 0.41  | -0.32 | 0.016 | 0.05  | 0.015 | -0.2  |
| Ethylene, tetrachloro-                   | 0.00 |      | 1.21  |       | 0.001 | 1.24  | 0.003 | 2.03  |

|                                                  |      |      |       |       |       |       |       |       |
|--------------------------------------------------|------|------|-------|-------|-------|-------|-------|-------|
| Ethylene, trichloro-                             | 0.01 |      | 1.52  |       | 0.01  | 1.29  | 0.019 | 1.86  |
| Ethylene, diphenyl-                              | 1.78 |      | -0.15 |       | 0.17  | -1.71 | 1.50  | -1.35 |
| Fumarate, diethyl                                | 0.23 | 0.02 | 2.41  | -0.41 | 0.25  | 2.26  | 0.61  | 1.25  |
| Fumarate, diisopropyl                            | 0.16 | 0.16 | 2.60  | 0.31  | 0.11  | 2.58  |       |       |
| Hexatriene, tetrachloro-                         | 1.77 | 1.97 | 1.10  | 0.44  | 1.83  | 0.94  | 1.85  | 0.75  |
| Imidazole, <i>N</i> -vinyl                       | 0.05 | 0.53 | 0.34  | -0.22 | 0.11  | -0.68 |       |       |
| Isoprene                                         | 1.80 | 1.44 | -0.56 | -1.02 | 1.99  | -0.55 | 3.33  | -1.22 |
| Isopropenyl isocyanate                           | 0.15 | 0.10 | -0.91 | -0.30 | 0.18  | -1.05 | 0.16  | -0.7  |
| Isopropenyl methyl ketone                        | 0.78 | 0.49 | 0.72  | 0.01  | 1.03  | 0.64  |       |       |
| Itaconic acid                                    | 0.78 | 0.43 | 1.19  | 0.65  | 0.78  | 1.07  | 0.76  | 0.5   |
| Itaconic anhydride                               | 8.75 | 1.86 | 0.83  | 0.75  |       |       | 2.5   | 0.88  |
| Maleate, diethyl                                 | 0.03 | 0.03 | 1.19  | -0.21 | 0.053 | 1.08  | 0.059 | 1.49  |
| Maleic anhydride                                 | 0.26 | 0.04 | 2.17  | 0.42  | 0.86  | 3.69  | 0.23  | 2.25  |
| Maleimide, <i>N</i> -(2-chlorophenyl)-           | 2.71 | 5.05 | 2.59  | 1.62  | 2.29  | 2.87  |       |       |
| Methacrylamide, <i>N</i> -phenyl-                | 0.36 | 0.57 | 0.20  | -0.43 | 0.40  | 0.19  |       |       |
| Methacrylate, benzyl                             | 0.79 | 0.49 | 0.31  | 0.03  | 0.88  | 0.35  | 0.70  | 0.42  |
| Methacrylate, 2-bromoethyl                       | 0.89 | 0.96 | 0.77  | 0.54  | 1.18  | 0.74  | 0.95  | 0.57  |
| Methacrylate, butyl                              | 0.62 | 0.52 | 0.43  | -0.02 | 0.82  | 0.28  | 0.78  | 0.51  |
| Methacrylate, isobutyl                           | 0.75 | 0.49 | 0.34  | 0.13  | 0.82  | 0.27  | 0.87  | 0.34  |
| Methacrylate, 2-chloroethyl                      | 1.11 | 0.47 | 0.31  | 0.40  | 1.04  | 0.31  | 0.81  | 0.53  |
| Methacrylate, ferrocenylmethyl                   | 0.27 | 0.01 | -0.78 | 1.85  | 0.22  | 0.65  | 0.13  | 1.26  |
| Methacrylate, glycidyl                           | 1.04 | 0.59 | 0.25  | 0.15  | 0.96  | 0.25  | 1.03  | 0.57  |
| Methacrylate, 2-hydroxyethyl                     | 0.83 | 0.57 | 0.35  | -0.10 | 1.78  | -0.39 | 0.8   | 0.2   |
| Methacrylate, methyl                             | 0.93 | 0.55 | 0.15  | 0.20  | 0.78  | 0.40  | 0.74  | 0.40  |
| Methacrylate, 3,5-dimethyladamantyl              | 0.58 | 0.65 | 0.02  | 0.03  |       |       |       |       |
| Methacrylate, 2,2,6,6-tetramethyl-4-piperidinyl- | 1.74 | 0.25 | -0.91 | 1.57  | 0.52  | -1.09 |       |       |
| Methacrylate, phenyl                             | 0.97 | 0.26 | 0.97  | -0.37 | 1.25  | 0.79  | 1.49  | 0.73  |

|                                                 |       |      |       |       |       |       |       |       |
|-------------------------------------------------|-------|------|-------|-------|-------|-------|-------|-------|
| Methacrylic acid                                | 2.37  | 0.30 | -0.10 | -0.80 | 0.98  | 0.62  | 2.34  | 0.65  |
| Methacrylonitrile                               | 0.70  | 0.72 | 0.85  | 0.48  | 0.86  | 0.68  | 1.12  | 0.81  |
| Methacryloylacetone                             | 8.88  | 1.74 | -0.15 | 0.08  | 5.47  | -0.76 |       |       |
| Methylenebutyrolactone                          | 3.12  | 0.60 | 0.79  | -0.10 | 2.48  | 0.83  |       |       |
| Naphthalene, 1-vinyl-                           | 0.84  | 1.00 | -0.14 | -1.06 |       |       | 1.94  | -1.12 |
| Oct-1-ene, 6,6-dimethyl-4,8-dioxaspiro (2,5)-   | 0.19  | 0.52 | 0.45  | 0.51  | 0.25  | 0.61  |       |       |
| Oxazoline, 2-isopropenyl-                       | 0.80  | 0.46 | -0.02 | -0.43 | 0.59  | -0.64 |       |       |
| Oxazoline, 2-isopropenyl-4,4-dimethyl-          | 0.71  | 0.83 | 0.38  | 0.16  | 0.87  | 0.34  |       |       |
| Pentadienoate, trans-4-ethoxy-2,4-, ethyl       | 12.14 | 6.34 | 0.10  | -0.72 |       |       |       |       |
| Phthalimide, N-vinyl-                           | 0.13  | 0.08 | -0.53 | 0.28  |       |       | 0.36  | -1.52 |
| Propene, 3,3,3-trichloro-                       | 0.03  | 0.05 | 1.07  | 0.02  | 0.03  | 1     | 0.056 | 1.37  |
| Pyridazinone, 3-(2-vinyl)-6-methyl-             | 0.47  | 0.27 | 0.28  | -1.06 | 0.57  | 0.24  |       |       |
| Pyridazinone, 3-(2-vinyl)-6-methyl-4,5-dihydro- | 0.11  | 0.06 | -0.24 | -1.25 | 0.18  | -0.32 |       |       |
| Pyridine, 2-methyl-5-vinyl-                     | 0.72  | 0.42 | 0.06  | -0.82 | 1.32  | -0.66 |       |       |
| Pyridine, 2-vinyl-                              | 1.02  | 0.66 | -0.04 | -0.84 | 1.41  | -0.42 | 1.3   | -0.5  |
| Pyridine, 2-vinyl-5-ethyl-                      | 1.20  | 0.97 | -0.65 | -0.78 | 1.29  | -0.91 | 1.37  | -0.74 |
| Pyridine, 4-vinyl-                              | 1.04  | 0.43 | -0.03 | -0.62 | 2.47  | 0.84  | 1     | -0.28 |
| Silane, 3-methacryloxypropyl, trimethoxy-       | 1.20  | 1.22 | 0.04  | 0.40  |       |       |       |       |
| Styrene ( <i>reference</i> )                    | 1.00  | 1.00 | -0.80 | -0.80 | 1     | -0.8  | 1     | -0.8  |
| Styrene, <i>p</i> -acetoxy-                     | 0.88  | 0.92 | -0.45 | -0.89 |       |       |       |       |
| Styrene, 3-tri- <i>n</i> -butylstannyl-         | 0.03  | 0.00 | 0.13  | -2.00 | 0.014 | -0.61 |       |       |
| Styrene, 2,5-dichloro-                          | 1.18  | 0.07 | 0.79  | -1.12 | 1.5   | 0.94  | 1.6   | 0.09  |
| Styrene, <i>p</i> -chloromethyl-                | 1.09  | 0.81 | -0.31 | -0.66 | 1.39  | -0.38 |       |       |
| Styrene, <i>p</i> -1-(2-hydroxypropyl)-         | 0.71  | 0.69 | -0.33 | -0.59 | 1.08  | -0.35 |       |       |
| Styrene, $\alpha$ -methoxy                      | 0.49  | 0.08 | -1.05 | -0.49 | 1.53  | -1.40 |       |       |

|                                           |      |      |       |       |       |       |       |       |
|-------------------------------------------|------|------|-------|-------|-------|-------|-------|-------|
| Styrene, $\alpha$ -methyl                 | 0.89 | 0.58 | -0.77 | -1.03 | 0.97  | -0.81 | 0.98  | -1.27 |
| Styrene, $p$ -methyl                      | 0.98 | 0.86 | -0.63 | -0.87 | 1.1   | -0.63 | 1.27  | -0.98 |
| Succinimide, $N$ -vinyl                   | 0.19 | 0.02 | -1.28 | 1.03  | 0.19  | -1.42 | 0.13  | -0.34 |
| Tetrazole, 1-vinyl-                       | 0.16 | 0.18 | -0.18 | -0.06 | 0.13  | -0.14 |       |       |
| Tetrazole, 5-phenyl-2-(4'-vinyl)-phenyl-  | 0.69 | 1.03 | 0.59  | -0.55 | 1.11  | 0.53  |       |       |
| Toluenesulphonamide, $N,N$ -methyl-vinyl- | 0.14 | 0.04 | -0.49 | -0.43 | 0.18  | -0.53 | 0.082 | -1.1  |
| Triallyl citrate                          | 0.04 | 0.06 | -0.41 | -0.53 | 0.054 | 0.26  |       |       |
| Vinyl acetate                             | 0.01 | 0.02 | -0.35 | 0.13  | 0.026 | -0.88 | 0.026 | -0.22 |
| Vinyl benzoate                            | 0.02 | 0.03 | -0.12 | -0.89 | 0.03  | -0.89 | 0.061 | -0.55 |
| Vinyl benzoic acid, $p$ -                 | 1.84 | 0.95 | 0.02  | -0.10 |       |       | 0.76  | -0.12 |
| Vinyl benzyl methyl carbinol              | 0.68 | 0.69 | -0.29 | -0.60 |       |       |       |       |
| Vinyl bromide                             | 0.04 | 0.05 | -0.14 | -0.27 | 0.038 | -0.23 | 0.047 | -0.25 |
| Vinyl isobutyl ether                      | 0.06 | 0.35 | -1.24 | -0.21 | 0.03  | -1.27 | 0.023 | -1.77 |
| Vinyl butyl sulfide                       | 0.41 | 0.05 | -0.91 | -0.42 |       |       | 0.33  | -1.2  |
| Vinyl isobutyl sulfide                    | 0.46 | 0.05 | -0.92 | -0.63 | 0.49  | -0.95 | 0.53  | -1.7  |
| Vinyl tert-butyl sulfide                  | 0.30 | 0.21 | -1.13 | -0.89 | 0.046 | -2.20 | 0.26  | -1.1  |
| Vinyl chloride                            | 0.03 | 0.04 | -0.07 | -0.42 | 0.056 | 0.16  | 0.044 | 0.2   |
| Vinyl chloroacetate                       | 0.04 | 0.03 | -1.62 | 0.22  | 0.039 | -1.61 | 0.074 | -0.65 |
| Vinyl dichloroacetate                     | 0.03 | 0.10 | -0.03 | -1.28 | 0.059 | -1.38 | 0.17  | -0.68 |
| Vinyl 2-chloroethyl ether                 | 0.01 | 0.11 | -1.67 | -0.49 | 0.019 | -1.64 |       |       |
| Vinyl chloromethyl ketone                 | 2.90 | 0.48 | 0.45  | -0.05 | 16    | 1.78  |       |       |
| Vinyl cymantrene                          | 0.23 | 0.06 | -0.03 | -0.64 | 0.39  | -0.57 |       |       |
| Vinyl dodecyl ether                       | 0.03 |      | -1.15 |       | 0.041 | -1.69 | 0.033 | -0.74 |
| Vinylene carbonate                        | 0.01 | 0.05 | 0.02  | -0.09 | 0.04  | -0.49 |       |       |
| Vinyl ethyl ether                         | 0.02 | 0.06 | -1.67 | -0.23 | 0.018 | -1.8  | 0.032 | -1.17 |
| Vinyl ethyl oxalate                       | 0.09 |      | 0.08  |       | 0.056 | -0.65 | 0.092 | -0.26 |
| Vinyl ethyl sulfide                       | 0.28 | 0.29 | -1.32 | -0.91 | 0.27  | -1.31 | 0.32  | -1.45 |

|                                    |      |      |       |       |       |       |       |       |
|------------------------------------|------|------|-------|-------|-------|-------|-------|-------|
| Vinyl ethyl sulfoxide              | 0.07 | 0.06 | 0.01  | -0.66 | 0.065 | 0.05  | 0.13  | 0.61  |
| Vinyl ferrocene                    | 0.26 | 0.16 | -0.71 | -0.36 | 0.31  | -1.34 |       |       |
| Vinyl hendecanoate                 | 0.03 | 0.05 | -0.49 | -0.03 | 0.056 | -0.84 |       |       |
| Vinylidene chloride                | 0.24 | 0.14 | 0.28  | 0.21  | 0.31  | 0.34  | 0.22  | 0.36  |
| Vinyl isocyanate                   | 0.15 | 0.08 | -1.06 | 0.02  |       |       | 0.16  | -0.7  |
| Vinyl isothiocyanate               | 0.51 | 0.60 | 0.44  | 0.25  | 0.59  | 0.37  | 0.54  | 0.25  |
| Vinyl methyl ketone                | 0.72 | 0.79 | 1.15  | 0.46  | 0.66  | 1.05  |       |       |
| Vinyl phenyl ether                 | 0.14 | 0.09 | 0.98  | 1.22  | 0.046 | -2.16 |       |       |
| Vinyl phenyl sulfide               | 0.30 | 0.17 | -0.96 | -1.08 | 0.33  | -0.99 | 0.34  | -1.4  |
| Vinyl stearate                     | 0.03 | 0.05 | 0.18  | -0.10 | 0.043 | -0.97 | 0.034 | -0.52 |
| Vinyl triethoxysilane              | 0.02 | 0.10 | 0.22  | 0.71  | 0.021 | 0.87  | 0.028 | -0.42 |
| Vinyl-tris(trimethoxysiloxy)silane | 0.02 | 0.01 | -0.13 | 1.01  | 0.022 | -0.12 |       |       |
| Vinyl trimethylsilane              | 0.04 | 0.05 | 0.33  | 0.02  | 0.027 | 0.19  | 0.029 | 0.04  |

---

<sup>a</sup>Greenley's and Young's data were taken from the *Polymer Handbook*.<sup>2,3</sup>

Table S3. Intrinsic  $Q$ - $e$  parameters ( $Q_M^\circ, e_M^\circ$ ),  $Q$ - $e$  parameters ( $Q_M, e_M$ ), and Greenley's  $Q$ - $e$  parameters ( $Q_G, e_G$ ) for the transfer agents<sup>a</sup>

| Transfer agent                   | $Q_M^\circ \times 10^4$ | $e_M^\circ$ | $Q_M \times 10^4$ | $e_M$ | $Q_G \times 10^4$ | $e_G$ |
|----------------------------------|-------------------------|-------------|-------------------|-------|-------------------|-------|
| Acetaldehyde                     | 8.5                     | 1.51        | 22.0              | -0.06 |                   |       |
| Acetamide, <i>N,N</i> -dimethyl- | 4.6                     | 3.14        | 6.28              | 0.74  |                   |       |
| Acetic acid                      | 2.22                    | 4.23        | 1.97              | 1.28  |                   |       |
| Acetone                          | 0.32                    | 1.96        | 0.70              | 0.16  | 0.11              | 0.35  |
| Acetonitrile                     | 0.44                    | 1.70        | 1.06              | 0.04  |                   |       |
| Allyl chloride                   | 15.1                    | 4.15        | 13.8              | 1.24  |                   |       |
| Aluminum, hydrodiisobutyl        | 275000                  | 7.46        | 68200             | 2.88  |                   |       |
| Aluminum, triethyl               | 125000                  | 8.57        | 20020             | 3.42  |                   |       |
| Aluminum, triisobutyl            | 285000                  | 3.24        | 374000            | 0.79  |                   |       |
| Aniline                          | 20                      | 2.30        | 37.9              | 0.33  |                   |       |
| Aniline, <i>N,N</i> -dimethyl-   | 53                      | 0.88        | 176               | -0.36 |                   |       |
| Anthracene                       | 20000                   | 3.32        | 25400             | 0.84  |                   |       |
| Benzene                          | 0.03                    | -1.19       | 0.23              | -1.39 | 0.05              | -1.21 |
| Benzene, bromo-                  | 1.78                    | 3.49        | 2.12              | 0.92  |                   |       |
| Benzene, <i>tert</i> -butyl-     | 0.05                    | -0.43       | 0.28              | -1.01 |                   |       |
| Benzene, chloro-                 | 0.41                    | 2.56        | 0.70              | 0.46  | 0.07              | 0.08  |
| Benzene, ethyl-                  | 0.7                     | -0.71       | 4.36              | -1.15 | 0.95              | -1.02 |
| <i>p</i> -Benzoquinone           | 2270000                 | 8.38        | 392000            | 3.33  |                   |       |
| Borane, tributyl                 | 34.8                    | -2.01       | 361               | -1.79 |                   |       |
| Butanone                         | 5                       | 2.97        | 7.30              | 0.66  |                   |       |
| Butyl alcohol                    | 1.6                     | 0.95        | 5.16              | -0.33 | 0.53              | -0.57 |
| <i>sec</i> -Butyl alcohol        | 0.56                    | -1.94       | 5.66              | -1.76 |                   |       |
| <i>tert</i> -Butyl alcohol       | 0.3                     | 2.84        | 0.46              | 0.60  |                   |       |
| Butyl mercaptan                  | 219900                  | 7.20        | 60500             | 2.75  |                   |       |

|                                                                |           |       |          |       |      |       |
|----------------------------------------------------------------|-----------|-------|----------|-------|------|-------|
| Butyric acid, 4-hydroxy- $\gamma$ -lactone                     | 0.4       | 2.66  | 0.66     | 0.51  |      |       |
| Cadmium, dibutyl                                               | 1170      | -0.63 | 7050     | -1.11 |      |       |
| Carbonic acid, cyclic ethylene ester                           | 0.24      | 3.83  | 0.25     | 1.09  |      |       |
| Chloroform                                                     | 0.5       | 0.77  | 1.73     | -0.42 |      |       |
| Copper (II) chloride                                           | 103000000 | 8.25  | 18800000 | 3.26  |      |       |
| Cumene                                                         | 0.9       | -0.61 | 5.38     | -1.10 |      |       |
| Cyclohexane                                                    | 0.05      | -0.50 | 0.29     | -1.05 | 0.11 | -0.64 |
| Dimethyl sulfoxide                                             | 0.5       | 3.76  | 0.53     | 1.05  |      |       |
| Diphenylamine                                                  | 0.9       | -3.44 | 16.4     | -2.49 |      |       |
| Ethane,1,2-dichloro-                                           | 2         | 3.53  | 2.34     | 0.94  | 0.62 | 1.34  |
| Ethane, 1,1,2,2-tetrachloro-                                   | 10.8      | 4.46  | 8.74     | 1.40  |      |       |
| Ether, dodecyl vinyl                                           | 3.72      | 2.93  | 5.50     | 0.64  |      |       |
| Ethyl acetate                                                  | 15.5      | 5.03  | 10.1     | 1.68  | 0.07 | -0.87 |
| Formamide, <i>N,N</i> -dimethyl-                               | 1         | 2.20  | 1.98     | 0.28  |      |       |
| $\alpha$ -D-Glucoside, methyl, 6-deoxy-6-mercapto-             | 55000     | 6.96  | 16600    | 2.63  |      |       |
| $\alpha$ -D-Glucoside, methyl-, di- <i>O</i> -benzyl-          | 62        | 2.85  | 95       | 0.60  |      |       |
| $\alpha$ -D-Glucoside, methyl-2,3,4,6-tetra- <i>O</i> -acetyl- | 2         | 0.51  | 7.69     | -0.55 |      |       |
| $\alpha$ -D-Glucoside, methyl-6-( <i>p</i> -toluene sulfonyl)- | 2         | 1.61  | 4.99     | -0.01 |      |       |
| $\alpha$ -D-Glucoside, methyl-6- <i>O</i> -triphenylmethyl-    | 21        | 1.88  | 47.0     | 0.13  |      |       |
| $\beta$ -D-Glucoside, methyl-6-deoxy-6-dipropylamino-          | 22        | -0.69 | 136      | -1.14 |      |       |
| Glycerol                                                       | 28.64     | 3.42  | 35.0     | 0.88  |      |       |
| Heptanol, dodecafluoro-                                        | 13.33     | 5.17  | 8.18     | 1.75  |      |       |
| Indium, triethyl                                               | 17600     | 5.29  | 10300    | 1.81  |      |       |
| Iron(III) chloride                                             | 5360000   | 8.30  | 9570000  | 3.29  |      |       |



|                                   |       |       |       |       |      |       |
|-----------------------------------|-------|-------|-------|-------|------|-------|
| Isobutyl alcohol                  | 0.5   | -0.65 | 3.04  | -1.12 |      |       |
| Isobutyronitrile                  | 2.7   | 3.15  | 3.67  | 0.75  |      |       |
| Lead, tetraethyl                  | 1.24  | -2.06 | 13.1  | -1.81 |      |       |
| Mercury, diethyl                  | 0.34  | -2.14 | 3.71  | -1.85 |      |       |
| Methane, dichloro-                | 0.15  | 0.20  | 0.65  | -0.70 | 0.1  | -0.68 |
| Methane, tetrabromo-              | 22000 | 6.47  | 8070  | 2.39  | 7300 | 2.9   |
| Methane, tetrachloro-             | 100   | 7.83  | 21.4  | 3.06  | 3.64 | 3.21  |
| Methane, nitro-                   | 10    | 3.73  | 10.8  | 1.04  | 3.26 | -1.5  |
| Methanol                          | 0.74  | 3.61  | 0.84  | 0.98  | 0.18 | -0.93 |
| Octadiene, 2,6-dimethyl-          | 2     | -2.20 | 22.3  | -1.88 |      |       |
| Oxime, acrolein-                  | 10800 | -0.84 | 70700 | -1.21 |      |       |
| Oxime, crotonaldehyde-            | 1500  | 0.60  | 5560  | -0.50 |      |       |
| Oxime, ethyl isopropenyl ketone-  | 4300  | 2.35  | 8020  | 0.36  |      |       |
| Oxime, methacrolein-              | 13000 | 1.24  | 37500 | -0.19 |      |       |
| Oxime, methylacrolein-            | 400   | -1.68 | 3640  | -1.63 |      |       |
| Oxime, methyl isopropenyl ketone- | 1100  | 0.48  | 4290  | -0.57 |      |       |
| Oxime, methyl vinyl ketone-       | 2700  | 1.73  | 6430  | 0.05  |      |       |
| Pentanol, octafluoro-             | 11.36 | 5.01  | 7.42  | 1.67  |      |       |
| Silane, tetraethyl                | 8.12  | 2.27  | 15.6  | 0.32  |      |       |
| Stibine, tributyl                 | 58    | -4.34 | 1510  | -2.94 |      |       |
| Tin, tetrabutyl                   | 3.71  | 0.14  | 16.5  | -0.73 |      |       |
| Toluene                           | 0.12  | -0.06 | 0.58  | -0.83 |      |       |
| Triethylamine                     | 7.1   | -2.84 | 102   | -2.20 | 28.8 | -2.39 |
| Tripropylamine                    | 24.2  | -1.96 | 246   | -1.76 |      |       |
| Zinc, diethyl                     | 3660  | 1.74  | 8650  | 0.06  |      |       |

---

<sup>a</sup>Greenley's data were taken from the *Polymer Handbook*.<sup>2</sup>

**References:**

- 1 A. D. Jenkins and J. Jenkins, in *Polymer Handbook*, eds. J. Brandrup, E. H. Immergut and E. A. Grulke, Wiley-Interscience, New York, 4th Ed., 1999, p. II/321–327.
- 2 R. Z. Greenley, in *Polymer Handbook*, eds. J. Brandrup, E. H. Immergut and E. A. Grulke, Wiley-Interscience, New York, 4th Ed., 1999, p. II/309–319.
- 3 L. J. Young, in *Polymer Handbook*, eds. J. Brandrup and E. H. Immergut, Wiley-International, New York, 2nd Ed., 1975, pp. 387–404.
